# Supplementary material
Source: HighWire-hosted journal article supplement (https://cmaj.ca/highwire/filestream/73754/field_highwire_adjunct_files/0/190339-res-1-at.pdf)
Supplement: 190339-res-1-at.pdf [file 190339-res-1-at.pdf]

## Appendix 1 (as supplied by the authors): Prevalence Asian Population by Region

| Region Group* | Region                      | Prevalence Asian Population (%) |
|---------------|-----------------------------|---------------------------------|
| 1             | Richmond                    | 65                              |
| 2             | Vancouver                   | 41                              |
|               | Fraser North                | 33                              |
| 3             | Fraser South                | 17                              |
|               | North Shore/Coast Garibaldi | 13                              |
| 4             | South Vancouver Island      | 8.7                             |
|               | Fraser East                 | 4.6                             |
|               | Northeast                   | 3.9                             |
|               | Central Vancouver Island    | 3.7                             |
|               | Okanagan                    | 3.6                             |
|               | Northwest                   | 3.5                             |
|               | Northern Interior           | 3.1                             |
|               | North Vancouver Island      | 3.1                             |
|               | Thompson Cariboo Shuswap    | 2.9                             |
|               | East Kootenay               | 2.5                             |
|               | Kootenay Boundary           | 2.3                             |

\*For joint effects analysis, regions 1 and 2 were categorized as “high-risk regions” and regions 3 and 4 as “low-risk regions.”
